# Supplementary material for: A theoretical simulation of small-molecules sensing on an S-vacancy SnS2 monolayer
Source: Royal Society of Chemistry journal article supplement (doi:10.1039/c7cp00336f), 2017-01-01
Supplement: c7cp00336f1.pdf [file c7cp00336f1.pdf]

## Supplementary materials

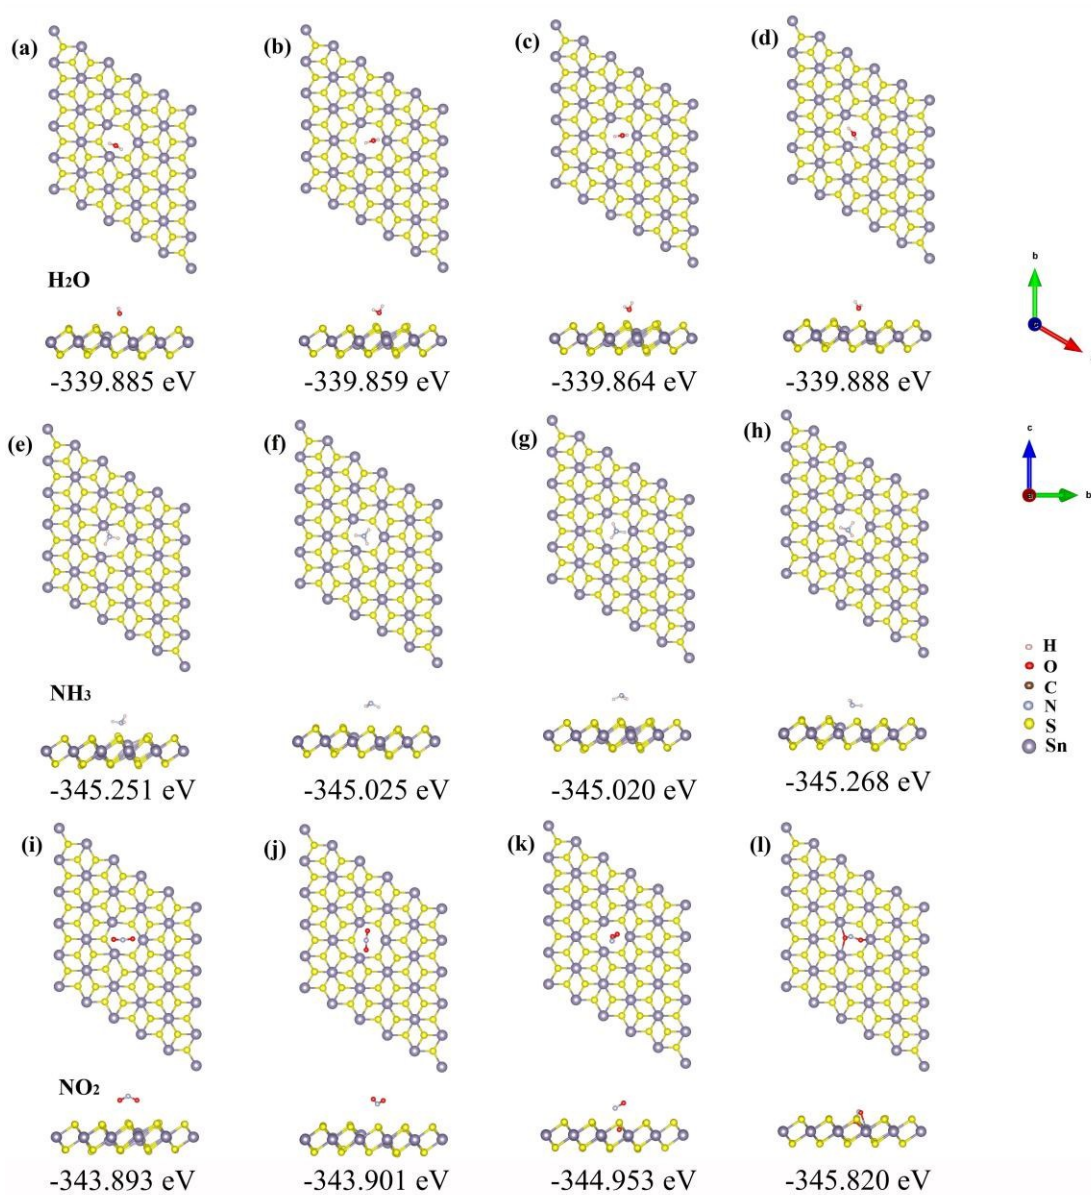

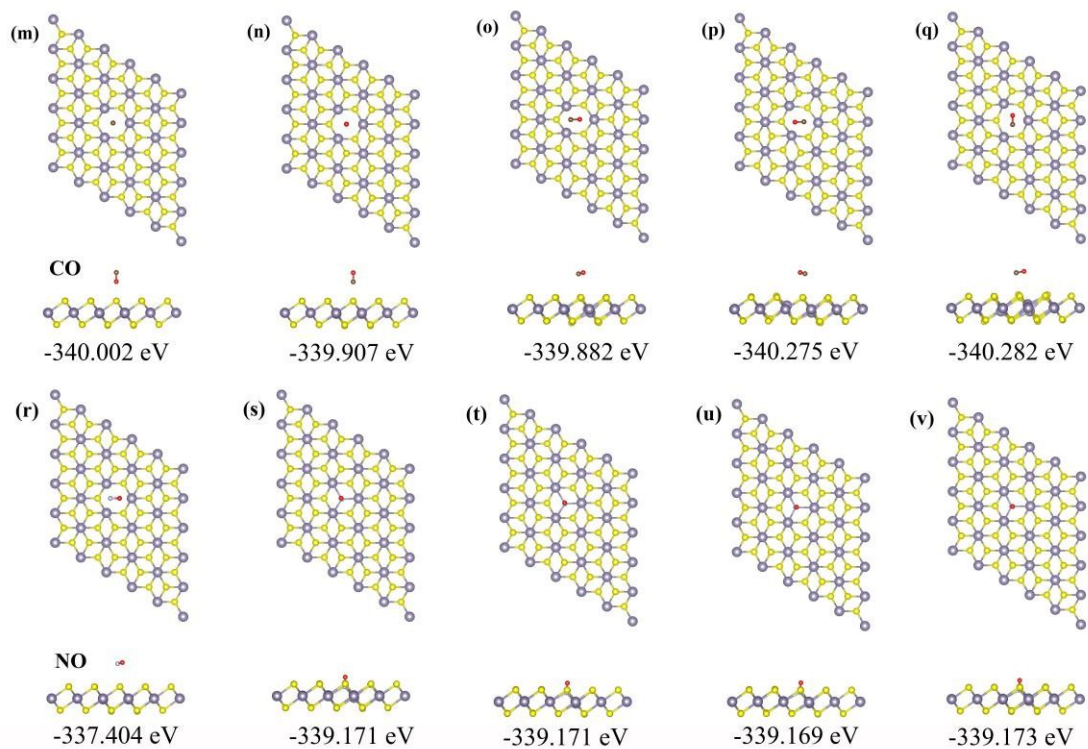

Figure S1. The models for gas molecule adsorbed s-vacancy SnS<sub>2</sub> monolayer systems in different configuration with corresponding adsorption energy.
